# Supplementary material for: Electrochemiluminescence response of a benzouril-constructed electrode to bipyridyl herbicides
Source: Royal Society of Chemistry journal article supplement (doi:10.1039/c8nj06512h), 2019-01-01
Supplement: c8nj06512h1.pdf [file c8nj06512h1.pdf]

## Supporting Information

### Electrochemiluminescence response of benzouril-constructed electrode for bipyridyl herbicides

Hai-Ling Li, Fei Qiu, Qing-Mei Ge, Mao Liu\*, Zhu Tao, Hang Cong\*

Key Laboratory of Macrocyclic and Supramolecular Chemistry of Guizhou Province, Guizhou University, Guiyang 550025, China.

E-mail: [liumao@outlook.com](mailto:liumao@outlook.com) for M. Liu

[hcong@gzu.edu.cn](mailto:hcong@gzu.edu.cn) for H. Cong

|                                                                                                           |    |
|-----------------------------------------------------------------------------------------------------------|----|
| Title, authors and description of supporting information content                                          | 1  |
| Figure S1 Job's plots of the interaction of benzo[6]uril <b>1</b> with guest <b>3</b>                     | 2  |
| Figure S2 ECL intensity of different incubation time of host <b>1</b> with guest <b>2</b>                 | 3  |
| Figure S3 ECL intensity of different incubation time of host <b>1</b> with guest <b>3</b>                 | 4  |
| Figure S4 <sup>1</sup> H NMR spectra of benzo[6]uril <b>1</b> at 25 °C                                    | 5  |
| Figure S5 <sup>13</sup> C NMR spectrum of benzo[6]uril <b>1</b>                                           | 6  |
| Figure S6 High resolution MS of benzo[6]uril <b>1</b>                                                     | 7  |
| Figure S7 ECL intensity of host <b>1</b> with 1 mM guest <b>2</b> and 100 mM guest <b>3</b>               | 8  |
| Figure S8 ECL intensity of host <b>1</b> with different concentrations of guest <b>2</b>                  | 9  |
| Figure S9 ECL intensity of host <b>1</b> with different concentrations of guest <b>3</b>                  | 10 |
| Figure S10 ECL intensity of host <b>1</b> absorbs luminol with different concentrations of guest <b>2</b> | 11 |
| Figure S11 ECL intensity of host <b>1</b> absorbs luminol with different concentrations of guest <b>3</b> | 12 |

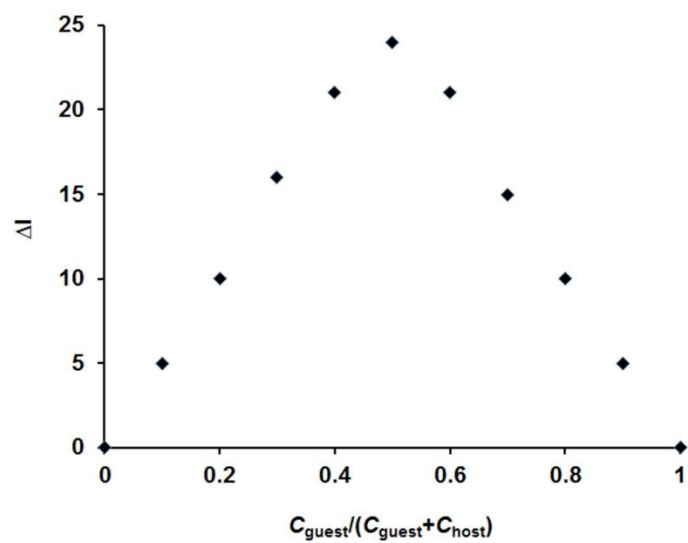

**Figure S1.** The Job's plot of the interaction between benzo[6]uril **1** and guest molecule **3**. The total concentration was maintained at  $1.0 \times 10^{-5} \text{ mol}\cdot\text{L}^{-1}$  and the fluorescence intensity was recorded at  $\lambda_{\text{em}} = 327 \text{ nm}$  and  $\lambda_{\text{ex}} = 304 \text{ nm}$ .

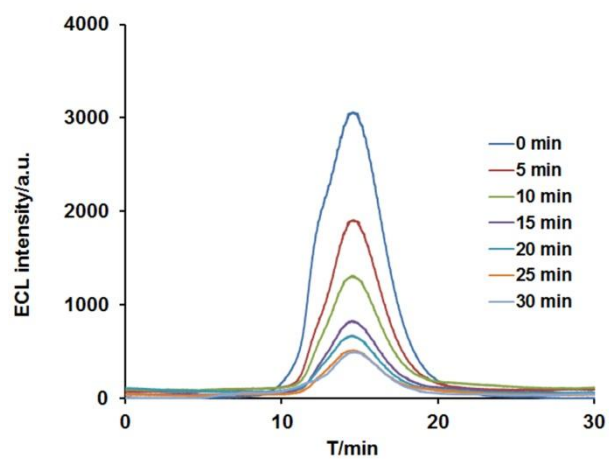

**Figure S2.** Effect of incubation time on the ECL intensity of the benzo[6]uril **1**/GCE in 0.2 M pH=12.0 hepes buffer solution after incubation in 1.0  $\mu$ M paraquat solution.

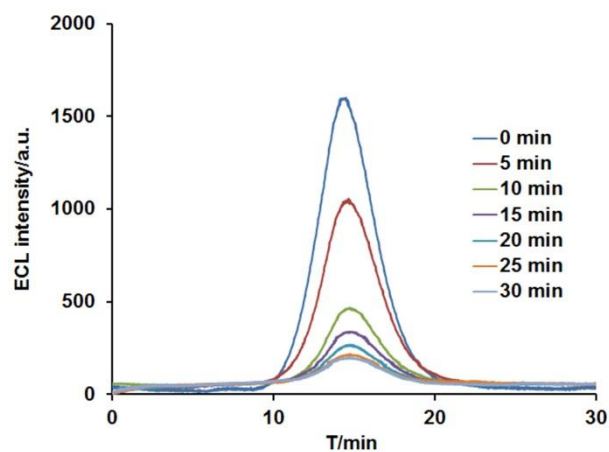

**Figure S3.** Effect of incubation time on the ECL intensity of the benzo[6]uril 1/GCE in 0.2 M pH=12.0 hepes buffer solution after incubation in 1.0  $\mu$ M diquat solution.

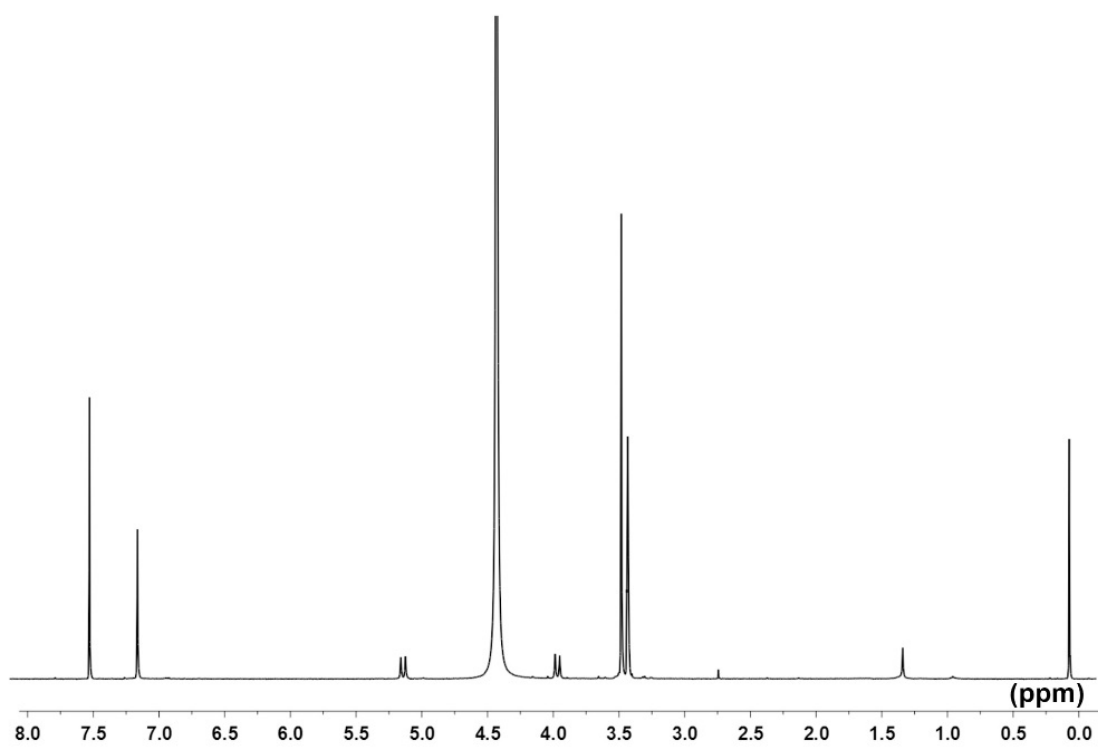

**Figure S4.**  $^1\text{H}$  NMR spectrum of benzo[6]juril **1** at 25 °C.

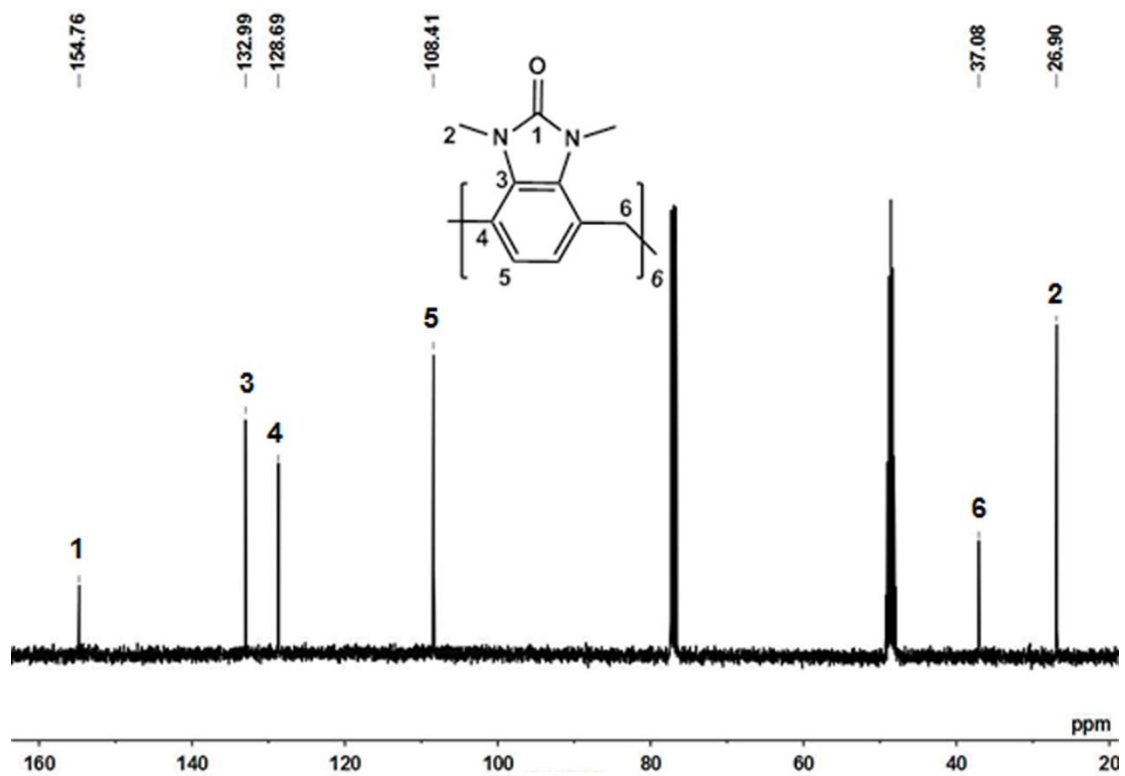

Figure S5.  $^{13}\text{C}$  NMR spectrum of benzo[6]uril 1.

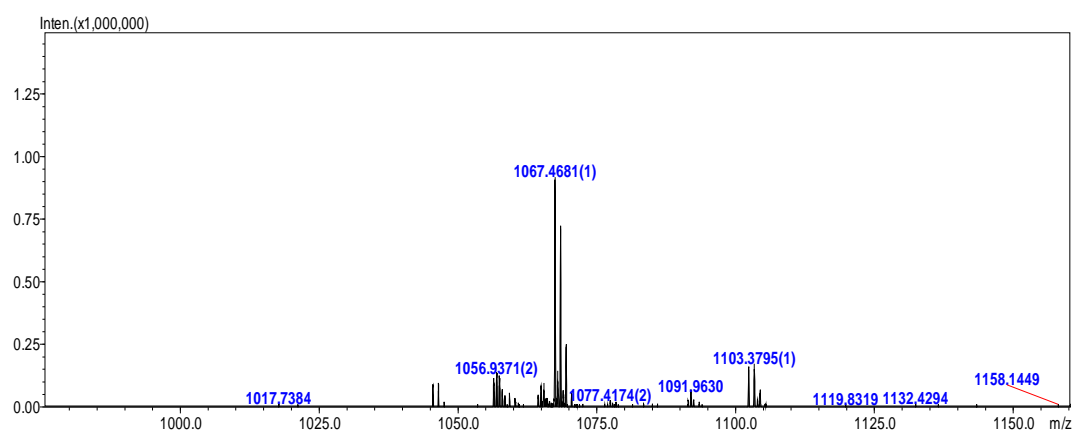

**Figure S6.** High resolution MS of benzo[6]uril 1.

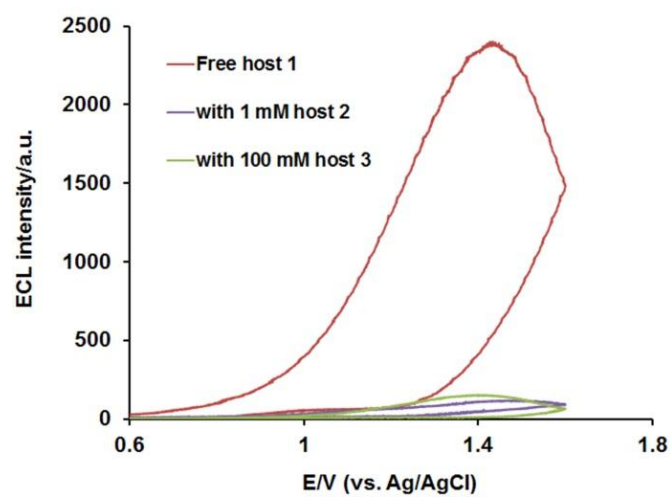

**Figure S7.** ECL intensity of host **1** with 1 mM guest **2** and 100 mM guest **3**.



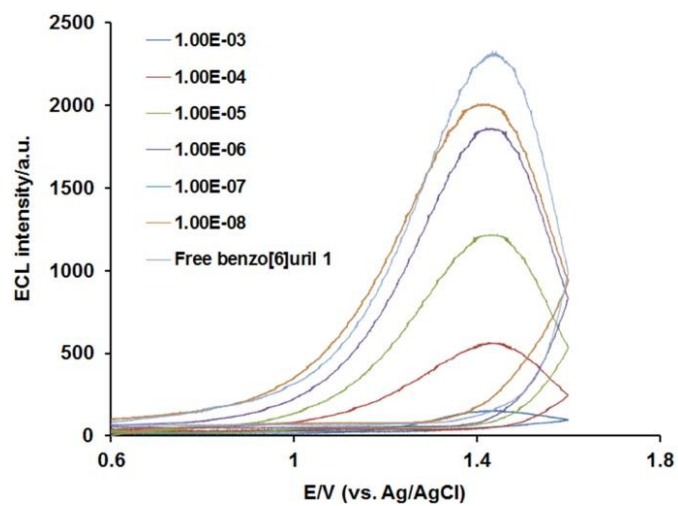

**Figure S8.** ECL intensity of host **1** with different concentrations of guest **2**.

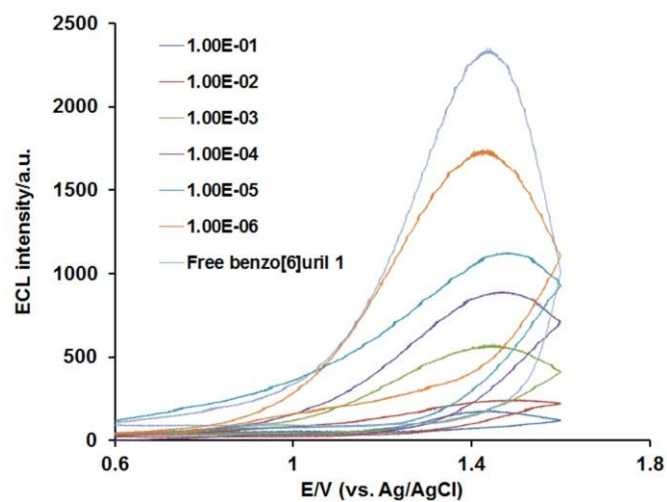

**Figure S9.** ECL intensity of host **1** with different concentrations of guest **3**.

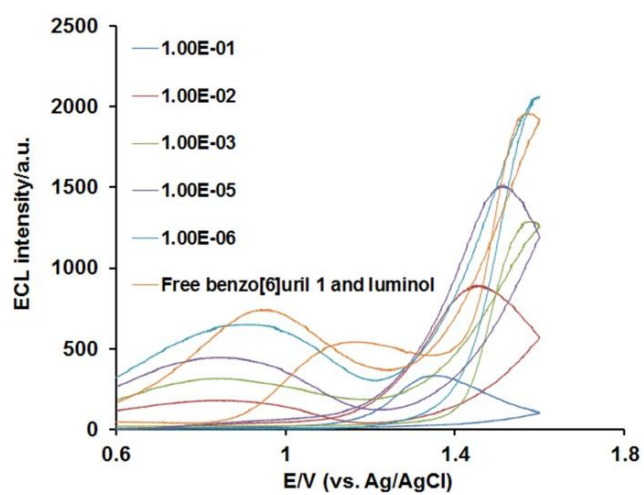

**Figure S10.** ECL intensity of host **1** absorbs luminol with different concentrations of guest **2**.

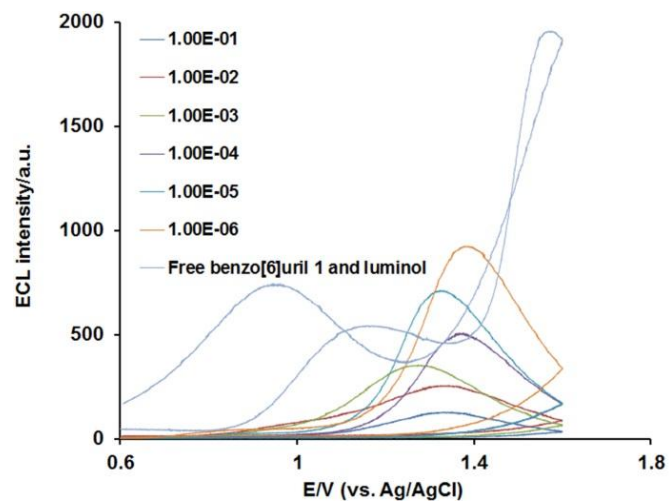

**Figure S11.** ECL intensity of host **1** absorbs luminol with different concentrations of guest **3**.
